## **Selective attention modulates surface filling-in**

William J. Harrison <sup>1,2,3,\*</sup>, Alvin J. Ayeni <sup>1</sup>, Peter J. Bex <sup>1</sup>

<sup>1</sup> Department of Psychology, Northeastern University, Boston, USA

<sup>2</sup> Department of Psychology, University of Cambridge, UK

<sup>3</sup> Queensland Brain Institute, The University of Queensland, Australia

\* Corresponding author ([willjharri@gmail.com](mailto:willjharri@gmail.com))

## 1 Abstract

2 **The visual system is required to compute objects from partial image structure so that figures**  
3 **can be segmented from their backgrounds. Although early clinical, behavioral, and modeling**  
4 **data suggested that such computations are performed pre-attentively, recent**  
5 **neurophysiological evidence suggests that surface filling-in is influenced by attention. In the**  
6 **present study we developed a variant of the classical Kanizsa illusory triangle to investigate**  
7 **whether voluntary attention modulates perceptual filling-in. Our figure consists of “pacmen”**  
8 **positioned at the tips of an illusory 6-point star and alternating in polarity such that two**  
9 **illusory triangles are implied to compete with one another within the figure. On each trial,**  
10 **observers were cued to attend to only one triangle, and then compared its lightness with a**  
11 **matching texture-defined triangle. We found that perceived lightness of the illusory shape**  
12 **depended on the polarity of pacmen framing the attended triangle, although the magnitude of**  
13 **this effect was weaker than when all inducers were of the same polarity. Our findings thus**  
14 **reveal that voluntary attention can influence lightness filling-in, and provide important data**  
15 **linking neurophysiological effects to phenomenology.**

## 16 Introduction

17 The natural environment is cluttered with mutual occlusions among objects. Our ability to group  
18 common parts of goal-relevant objects while segmenting them from distracting objects is a critical  
19 visual function. Visual illusions provide powerful tools to probe the neural computations involved  
20 in such perceptual organisation. Since being popularised several decades ago <sup>1</sup>, psychologists,  
21 neuroscientists, and philosophers have used Kanizsa figures to debate the mechanisms underlying  
22 the perception of occlusions, lightness and form. These figures give rise to a vivid percept of a  
23 shape emerging from sparse information, and thus demonstrate the visual system’s ability to  
24 interpolate structure from fragmented information, to perceive edges in the absence of luminance  
25 discontinuities, and to fill-in a shape’s surface properties <sup>1</sup>.

26 Visual attention – focusing on some parts of an image – is known to modulate the perception of  
27 figure-ground relationships. Driver and Baylis <sup>2</sup> found that figure-ground organization of  
28 ambiguous figures was influenced by the region to which observers attended. Attended regions  
29 were interpreted as figures, whereas unattended regions were interpreted as ground. In addition to  
30 manipulating depth order, Tse <sup>3</sup> found that voluntary attention can influence surface filling-in. He  
31 developed a visual illusion that demonstrates that voluntary attention modulates the lightness of  
32 overlapping transparent surfaces. In one version of this illusion, three discs are positioned around a

33 fixation point such that their borders overlap slightly. By covertly shifting attention to each disc in  
34 succession, the viewer can perceive the attended disc to be darker than the others, thus revealing  
35 that visual attention influences filling-in processes. In these cases, as well as others including  
36 Rubin’s classic face-vase figure or the Necker cube, visual attention modulates the appearance of  
37 surfaces that are defined physically. It remains unclear, however, whether visual attention  
38 modulates the visual system’s representation of illusory structure – i.e. structures that are generated  
39 by visual processing itself.

40 Psychophysical findings that visual attention influences figure-ground segmentation are consistent  
41 with the notion that visual attention acts on structure computed by border ownership cells. Qiu et al  
42 <sup>4</sup> investigated whether the responses of border-ownership cells in macaque area V2 are influenced  
43 by visual attention. Border-ownership cells signal which side is an object versus background for a  
44 given border. After determining the side preference of a sample of border-ownership cells, they  
45 displayed overlapping figures such that a border shared between two objects was positioned within  
46 the cells’ receptive fields. They found that some border-ownership cells signal figure-ground  
47 relationships in the absence of visual attention, but that the activity of other cells is modulated by  
48 visual attention. Qiu et al suggested that visual attention can influence figure-ground perception by  
49 modulating the gain of border-ownership cells, biasing perception more toward one percept over a  
50 competing one. Poort et al <sup>5</sup> further investigated the modulatory effects of attention on the responses  
51 of V1 and V4 neurons to object borders and surfaces. They found that, whereas the response of  
52 neurons to an object’s borders were relatively unaffected by attentional allocation, filling-in of an  
53 object’s surface was modulated by attention.

54 In contrast to the above studies suggesting an influence of attention over perceptual organization,  
55 other investigations suggested perception of illusory Kanizsa figures is pre-attentive. Mattingley et  
56 al <sup>6</sup> investigated whether Kanizsa figures were perceived by a stroke patient who experiences  
57 “extinction”, a phenomenal loss of awareness of contralesional stimuli when presented concurrently  
58 with ipsilesional stimuli. Despite gross lapses in attentional allocation to the contralesional space,  
59 this patient was nonetheless able to perceive Kanizsa figures whose illusory borders extended  
60 across the visual meridian. This finding suggests that filling-in is a pre-attentive process. Davis and  
61 Driver <sup>7</sup> drew a similar conclusion after having healthy participants perform a visual search task  
62 involving illusory figures. They found that the time taken to find an illusory figure in a display did  
63 not increase with additional search items, a hallmark of pre-attentive processing (but see reference  
64 <sup>8</sup>). The role of visual attention in computing illusory objects thus remains somewhat contentious.

65 In the present study, we designed a multi-stable illusory figure to investigate whether observers'  
66 visual attention can determine perceptual filling-in of illusory figures. Although an object's  
67 boundary is typically defined by luminance, color, or texture contrast, borders can be perceived  
68 where no physical difference exists when spatially discontinuous visual features are interpolated to  
69 create illusory contours. The illusory edges of the sort produced by Kanizsa figures composed of  
70 isolated 'pacman' inducers elicit contour responses in V2 neurons<sup>9</sup> and produce a vivid percept of a  
71 shape. Of particular importance to the present study, the surface of Kanizsa figures are filled-in,  
72 resulting in an apparent surface lightness of greater contrast than its immediate surrounds<sup>1,10</sup>.  
73 Kanizsa figures thus offer important insights into the mechanisms underlying perceptual  
74 organization by providing minimal conditions under which multiple phenomena arise.

75 Our new figure is composed of two spatially overlapping Kanizsa triangles (Fig. 1; Gaussian  
76 blurred to strengthen the effect, see also Fig. 2). On first inspection, the reader may perceive a grey  
77 star occluding six black and white discs. However, the black and white inducers are arranged so as  
78 to imply competing geometric forms. Whereas the black inducers imply an inverted triangle, the  
79 white inducers imply an upright triangle. These cues are equally physically salient so that, in the  
80 absence of attention, perceptual organization may be a random draw of any possible interpretation  
81 (e.g. a star, an upright triangle on top, or an inverted triangle on top). Thus, with a single image, we  
82 can manipulate observers' attention and test whether there is a corresponding systematic change in  
83 filling-in.

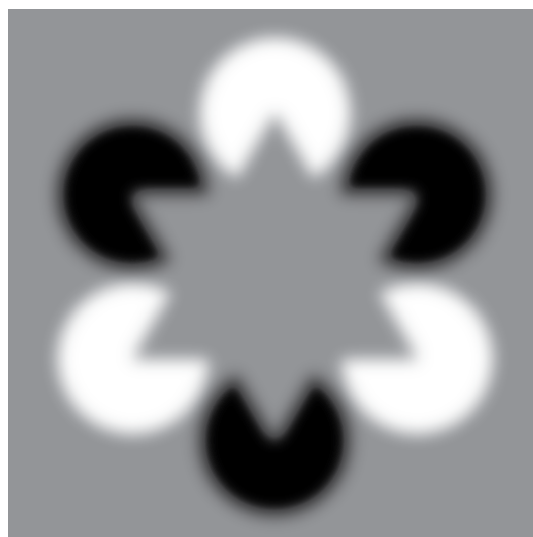

84

85 **Figure 1. A novel Kanizsa figure to test attention-contingent filling-in. When attending to the black inducers, a**  
86 **downward-pointing triangle emerge as the top-most surface, and this attention-contingent illusory triangle may**  
87 **appear lighter than its background. When attending to the white inducers, a darker, upward pointing triangle**  
88 **may appear forming the top-most object, and this may now appear darker than its background.**

89 We designed the stimulus in Figure 1 to control for the known lightness effect observed in the  
90 classic Kanizsa figure. In Figure 2A we show our novel stimulus alongside two other variants of the  
91 classic figure in which the inducers are all of the same polarity. When inducers are homogenous in  
92 their luminance, any influence of attention on the illusory surface could minimise or amplify the  
93 baseline illusion, and such an effect could be explained simply by an interaction of attention with  
94 the low-level stimulus properties. In contrast, we designed the mixed-inducer condition such that  
95 the perceptual outcome cannot be predicted by the low-level stimulus properties alone -- depth  
96 order and filling-in must be determined either stochastically, or according to an observer's selective  
97 attention. It was also critical for our stimulus to imply two spatially overlapping figures to test the  
98 hypothesis that depth order is determined prior to the stage at which visual attention operates e.g.  
99 <sup>6,11</sup>. Had we presented two spatially non-overlapping illusory figures, one defined by black inducers  
100 and the other defined by white inducers, any modulatory effect of attention on filling-in could be  
101 attributed to pre-computed structure (e.g. compare the apparent surface lightness of the  
102 homogenous-inducer stimuli of Fig. 2A). Therefore, the spatially overlapping implied triangles of  
103 our mixed-inducer condition allows us to assess if selective attention can modulate depth order of  
104 illusory surface properties inferred by the visual system.

## 105 **Results**

106 We investigated whether filling-in of an illusory surface can be modulated by voluntary endogenous  
107 attention. A typical trial sequence of our psychophysical task is shown in Figure 2C. Observers (n =  
108 15) reported the apparent lightness of only the upward oriented illusory triangle or only the  
109 downward oriented illusory triangle by comparing it with a luminance-defined matching triangle  
110 presented on a background of white noise. To draw observers' attention to one of the two illusory  
111 triangles, they were instructed to judge only the figure that matched the orientation of the  
112 luminance-defined triangle. We thus directed observers to attend to an illusory triangle defined by  
113 white (or black) inducers endogenously without making reference to the colour of the inducers. We  
114 refer to this condition as the "mixed inducer" condition. For comparison, we also included  
115 conditions in which all inducers were black or white ("homogenous inducer" condition; Fig. 2A).  
116 Whereas the critical mixed inducer condition allows us to investigate clearly the influence of  
117 voluntary attention on perceptual filling-in, the homogenous inducer condition provides a baseline  
118 in which conflict between competing structural cues is reduced. Finally, we further tested whether  
119 filling-in was affected by certainty of edge location by applying varying levels of blur to the  
120 Kanizsa figure and matching triangle background (Fig. 2B). The inducer condition, orientation of

121 the illusory figure, matching triangle, level of blur, and display side of the matching triangle were  
122 all counter-balanced across trials (see Methods for all experimental details).

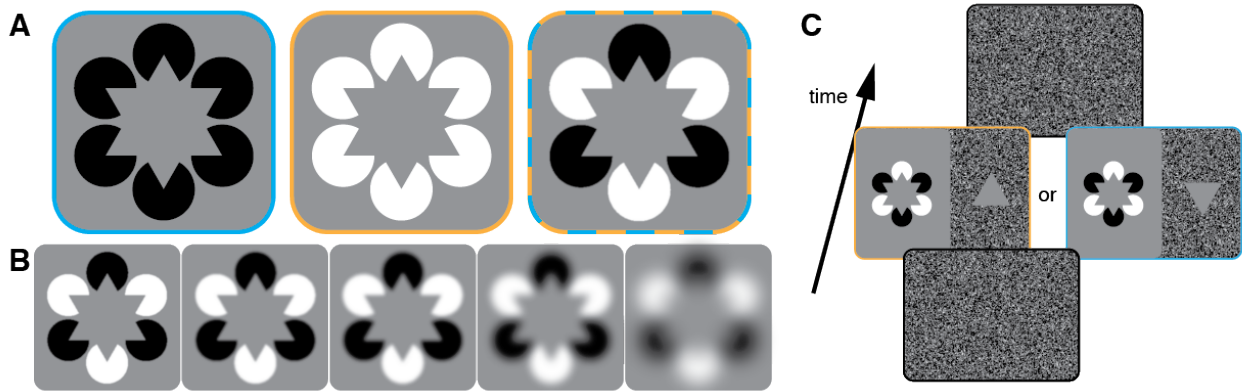

124 **Figure 2. Examples of all experimental stimuli and procedure. A) In the classical Kanizsa figures<sup>1</sup>, inducers**  
125 **within a figure were equal in luminance. In our experiment, we thus included “homogeneous inducer” conditions**  
126 **in which the inducers were all black (blue outline) or all white (orange outline). In these versions, the illusory**  
127 **hexagrams appear lighter and darker than their backgrounds, respectively. These conditions provided a relative**  
128 **baseline against which we could compare perception in our new “mixed inducer” figure (blue and orange**  
129 **outline). B) Illustrative examples of blur levels. Across conditions, we applied various Gaussian blur levels**  
130 **( $\sigma=0.1^\circ$  to  $30^\circ$  in log steps) to the inducers and to the white noise background (see (C) and Methods) in order to**  
131 **vary uncertainty about the illusory edges of the Kanizsa figure. Shown from left to right are the least to most**  
132 **blurred mixed inducer conditions. Note that in the most blurred condition, the sharp edges of the inducers were**  
133 **abolished. C) Two example mixed inducer trials. An observer reported whether the texture-defined matching**  
134 **triangle (shown here on the right half of the middle displays) was lighter or darker than the illusory triangle with**  
135 **the same orientation. In this example, the matching triangle implicitly cued the observer to attend to the illusory**  
136 **triangle in white inducers in the left stream, and to the illusory triangle in black inducers in the right stream. See**  
137 **Methods for details.**

138 We defined perceived lightness as a point of subjective equality (PSE), the mid-point of the  
139 psychometric function fit to the proportion of “lighter” responses as a function of the contrast of the  
140 matching triangle. Psychometric functions fit to data collapsed across participants and blur  
141 condition are shown in Figure 3. These fits were calculated without the most blurred condition in  
142 which the results were different than the other conditions (see Fig. 4A).

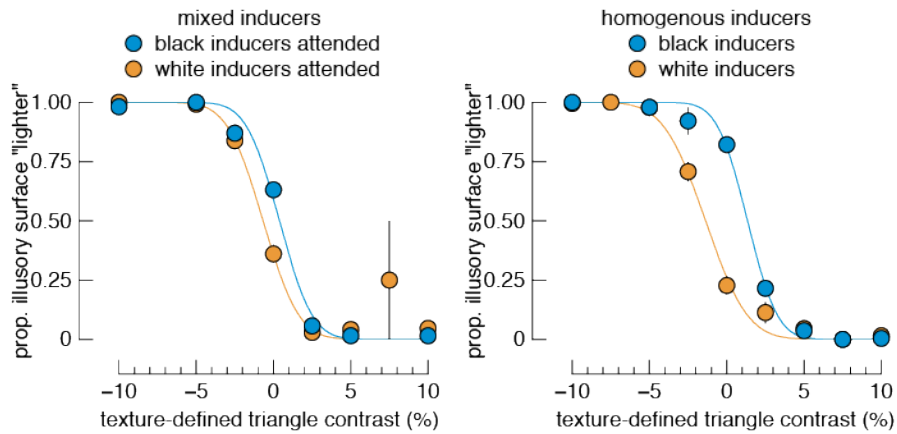

143

144 **Figure 3. Mean performance and psychometric functions. Data show the mean proportion of times observers**  
145 **reported the illusory surface as “lighter” than the texture-defined surface, as a function of the texture-defined**  
146 **triangle contrast. These data are averaged over all blur conditions except the most blurred condition, which was**  
147 **omitted due to its obscuring of the main effects (see Fig. 4A). Despite being shown the same stimulus in the**  
148 **“mixed inducer” condition, there is a difference in curves according to the attended inducer polarity (left panel).**  
149 **On average the effect is weaker than in the “homogenous inducer” condition (right panel). Note that for the**  
150 **main analyses presented in the Results, data were fit separately for each participant and each condition. Error**  
151 **bars show one standard error.**

152 PSEs for all conditions, averaged across participants, are shown in the right panel of Figure 4A. For  
153 all but the most blurred condition of the mixed inducer condition, illusory triangles defined by black  
154 inducers were perceived as lighter than illusory triangles defined by white inducers. This effect  
155 appears to be weakest for the two least blurred conditions. We verified these observations with  
156 Bayesian paired samples t-tests, comparing PSEs across inducer polarity within each blur level.  
157 There was strong evidence of a difference for the three most blurred conditions, but equivocal  
158 evidence of a difference of PSEs within the two least blurred conditions ( $BF_{10}$  in order of least to  
159 most blurred = 0.821, 1.627, 66.64, 10.585, and 80.393). Therefore, despite being shown the same  
160 image (within each blur condition), observers’ perceptual reports depend on their attentional goals.

161 We included a homogenous inducer condition in which all inducers were of the same polarity in  
162 each trial. This condition provides little ambiguity over the interpretation of the figure, but we  
163 nonetheless instructed observers to attend to only the shape cued by the texture-defined triangle.  
164 The homogenous inducer condition thus gives an indication of the upper-bound of the difference in  
165 PSEs between black vs white inducer conditions. Data from this condition are shown in the right  
166 panel of Figure 4A, and reveal a stronger effect of inducer polarity than the mixed inducer  
167 condition, with equal strength across all but the most blurred condition. Bayesian paired samples t-  
168 tests revealed strong evidence of a difference in PSE between the inducer polarities for the four



169 least blurred conditions, but evidence against a difference for the most blurred condition ( $BF_{10}$  in  
170 order of least to most blurred = 28.919, 427.841, 297.566, 105.704, and 0.304).

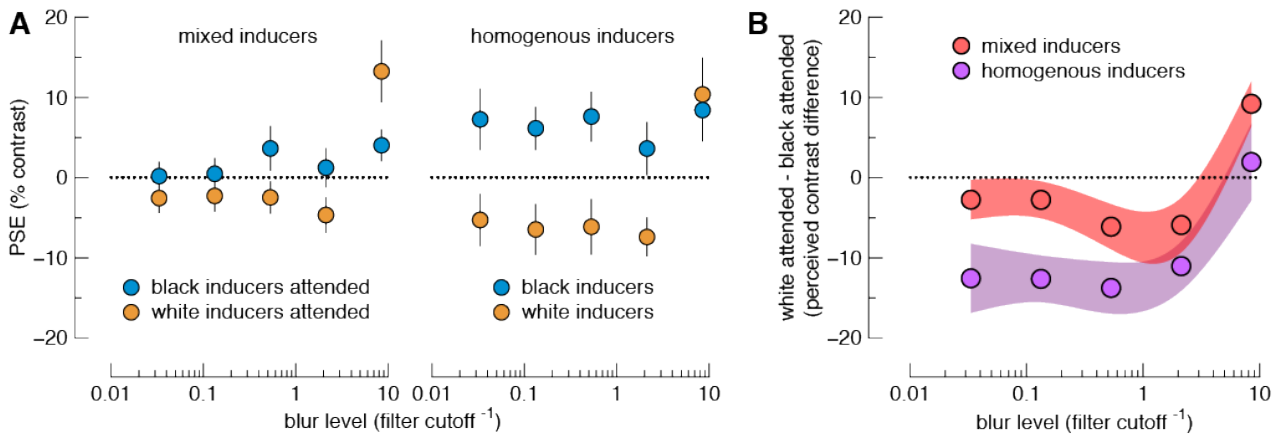

171

172 **Figure 4. Extended psychophysical data. A) PSEs from all tested conditions. Data show the point of subjective**  
173 **equality (PSE) for each condition over a range of blur levels (see Fig. 3). Positive and negative values on the**  
174 **ordinate indicate the attended surface was perceived as lighter or darker, respectively, than its actual luminance.**  
175 **Higher values on the abscissa indicate greater levels of blur. B) To facilitate comparison across all conditions, we**  
176 **plot the difference in PSEs between attend white inducer and attend black inducer conditions (ordinate). Data**  
177 **points thus show the perceived lightness difference between illusory surfaces embedded in white versus black**  
178 **inducer elements over a range of blur levels, with either mixed or homogeneous inducers. Negative values on the**  
179 **ordinate indicate that an attended surface in white inducers was perceived as darker than an attended surface in**  
180 **black inducers. Error bars in (A) show one standard error. Shaded regions in (B) show 95% confidence**  
181 **intervals. N = 15.**

182 The strength of the effect of attention on PSEs is further summarized in Figure 4B. In this figure we  
183 show the difference between attending to the figure in black inducers vs attending to the figure in  
184 white inducers for all conditions. To formally test for whether there was a difference between  
185 mixed vs homogenous inducer conditions, we submitted these difference scores to a 5 x 2 repeated  
186 measures Bayesian ANOVA, with factors blur level (5 levels of blur), and inducer type (2 levels:  
187 mixed vs homogenous). The best model included the two main effects (blur level + inducer type:  
188  $BF_{10} = 5.264e+17$ ). There was strong evidence against an interaction between factors ( $BF_{10} =$   
189 0.116).

190 Finally, we found weak to moderate evidence *against* a difference in the slope parameter of the  
191 psychometric functions for all black vs white inducer comparisons in Figure 4A (all  $BF_{10} < 0.5$ ; min  
192 = 0.262; max = 0.444).



## 193 **Discussion**

194 We asked observers to allocate their attention to varying elements of a novel illusory figure and  
195 report the perceived lightness of the surface of the center of the figure. By presenting the same  
196 figure on each trial and only manipulating observers' goals, we controlled physical aspects of the  
197 stimulus and found that observers' reports of perceived lightness were contingent on to which  
198 illusory figure they attended. We do not think observers selectively reported the apparent lightness  
199 of only some parts of a pre-attentively perceived image in the mixed inducer condition for three  
200 reasons. First, the influence of selective attention over depth order and apparent surface lightness  
201 can be experienced first-hand by the reader by inspecting Figure 1. Second, we had observers  
202 verbalise their reports during an initial practice session (see Methods), and they frequently reported  
203 that the attended triangle appeared as the top-most surface. Third, Harrison and Rideaux have  
204 reported that selectively attending to only some inducers of the mixed-inducer stimulus results in  
205 the perception of illusory edges between those inducers<sup>12</sup>, providing converging evidence that the  
206 depth ordering of the stimulus depends on observers' attention control. We thus infer that apparent  
207 surface lightness of our novel illusory figure can be modulated by attention.

208 We found that the strength of filling-in was weaker in the mixed-inducer condition than the  
209 homogenous inducer condition (Fig. 4B). There could be several reasons for this. First, there is a  
210 larger signal implied by the homogenous inducer condition, since all inducers share the same  
211 polarity. Second, lapses in attention on any given trial will have more impact on the mixed-inducer  
212 condition in which the opposite polarity inducers imply competing surface arrangements. Third, the  
213 modulatory effects of attention on filling-in in our mixed-inducer condition may simply be weaker  
214 than in cases in which attentional selection plays no role, which may have been the case in the  
215 homogenous inducer condition if observers perceived a star. Addressing this issue requires further  
216 investigation. Nonetheless, our finding of a difference in perceived lightness when black versus  
217 white inducers were attended in the same image (mixed inducer condition) reveals that illusory  
218 lightness is contingent on observers' attentional goals. For all but the most blurred conditions, we  
219 found filling-in was not substantially moderated by the amount of spatial blur added to the illusory  
220 figures induced by homogenous pacmen. This finding is consistent with the idea that filling-in  
221 involves broadly tuned spatial filters that are insensitive to high spatial frequencies. We did,  
222 however, find a reversal of the direction of filling-in for the most extreme blur (rightmost point in  
223 left panel of Fig. 4A). We speculate that the explanation for this is straightforward: because the  
224 inducers were so blurred that the implied tips of the triangles, and thus the illusory figure, were  
225 abolished. In this case, filling-in would be consistent with the contrast of the inducers, rather than

226 opposite to them. It is also worth noting that observers have a large bias to report the inner area of  
227 the figure as lighter in their responses for the most blurred homogenous inducer condition. This  
228 observation is not predicted by current accounts of filling in but we speculate that it could be related  
229 to the blackshot mechanism <sup>13</sup> that amplifies the relative salience of the dark inducers.

230 It has been shown that visual attention can affect perception over short timescales in multiple ways,  
231 such as by increasing apparent contrast or spatial frequency <sup>14</sup>. Any such effect in the present study  
232 requires an initial grouping stage, such that changes in contrast were selectively applied to only  
233 some features of the image. Selectively attending to only the inducers surrounding the cued target  
234 shape could cause illusory spreading of the apparent surface lightness. Whereas previous studies  
235 have shown that visual attention can influence depth order <sup>2</sup> or even surface lightness of semi-  
236 transparent discs <sup>3</sup>, the case presented here is unique in that it shows observers' task instructions  
237 alter the visual system's inference, creating one of multiple competing *illusory* surface appearances  
238 and arrangements.

239 Recent evidence suggests that cells in V2 play an important role in this process <sup>4,11,15,16</sup>. V2 cells are  
240 selective for an object's borders and the relative position of the object. A network of such "figure-  
241 ownership" cells may be supported by grouping cells, thus encoding figure-ground structure  
242 essential for visual cognition. Indeed, recent work has shown that when visual attention is allocated  
243 to a region of space from which a grouping cell is currently receiving structured input, figure-  
244 ground segmentation is enhanced by feedback from the grouping cell to its connected figure-  
245 ownership cells <sup>4,11,15</sup>. This model may account for our results. Attending to the upright (or inverted)  
246 triangle would result in the grouping cell enhancing the structured input to only the corresponding  
247 shape, biasing the processing of form and systematically altering perceptual organization. Our  
248 results are also consistent with recent neuro-imaging research in humans using  
249 electroencephalogram, in which top-down attention modulates early neural activity associated with  
250 illusory contour formation <sup>17</sup>. Our study provides important data that supports the notion that such  
251 top-down signals modulate perceptual phenomenology.

252 Our study thus helps to bridge a gap between psychophysical and neurophysiological investigations  
253 of figure-ground segmentation. Consistent with the activity of V4 neurons found by Poort et al <sup>5</sup>, we  
254 found that perceptual filling-in of an object's surface is modulated by attention. However, unlike  
255 the conclusion of Poort et al that attention does not modulate the responses to the object's borders,  
256 our preliminary data using a similar figure to the present study suggests border computations also  
257 depend on voluntary attention <sup>12</sup>.

## 258 **References**

- 259 1. Kanizsa, G. Subjective contours. *Sci. Am.* 234, 48–52 (1976).
- 260 2. Driver, J. & Baylis, G. C. Edge-assignment and figure-ground segmentation in short-term visual  
261 matching. *Cognit. Psychol.* 31, 248–306 (1996).
- 262 3. Tse, P. U. Voluntary attention modulates the brightness of overlapping transparent surfaces.  
263 *Vision Res.* 45, 1095–1098 (2005).
- 264 4. Qiu, F. T., Sugihara, T. & von der Heydt, R. Figure-ground mechanisms provide structure for  
265 selective attention. *Nat. Neurosci.* 10, 1492–1499 (2007).
- 266 5. Poort, J. *et al.* The role of attention in figure-ground segregation in areas V1 and V4 of the  
267 visual cortex. *Neuron* 75, 143–156 (2012).
- 268 6. Mattingley, J. B., Davis, G. & Driver, J. Preattentive filling-in of visual surfaces in parietal  
269 extinction. *Science* 275, 671–674 (1997).
- 270 7. Davis, G. & Driver, J. Parallel detection of Kanizsa subjective figures in the human visual  
271 system. *Nature* 371, 791–793 (1994).
- 272 8. Gurnsey, R., Poirier, F. J. & Gascon, E. There is no evidence that Kanizsa-type subjective  
273 contours can be detected in parallel. *Perception* 25, 861–874 (1996).
- 274 9. von der Heydt, R., Peterhans, E. & Baumgartner, G. Illusory contours and cortical neuron  
275 responses. *Science* 224, 1260–1262 (1984).
- 276 10. Rieger, J. & Gegenfurtner, K. R. Contrast sensitivity and appearance in briefly presented  
277 illusory figures. *Spat. Vis.* 12, 329–344 (1999).
- 278 11. Craft, E., Schütze, H., Niebur, E. & von der Heydt, R. A neural model of figure-ground  
279 organization. *J. Neurophysiol.* 97, 4310–4326 (2007).
- 280 12. Harrison, W. J. & Rideaux, R. *Voluntary control of illusory contour formation.* (bioRxiv, 2017).  
281 doi:10.1101/219279

- 282 13. Chubb, C., Landy, M. S. & Econopouly, J. A visual mechanism tuned to black. *Vision Res.* 44,  
283 3223–3232 (2004).
- 284 14. Carrasco, M. Visual attention: the past 25 years. *Vision Res.* 51, 1484–1525 (2011).
- 285 15. Mihalas, S., Dong, Y., von der Heydt, R. & Niebur, E. Mechanisms of perceptual organization  
286 provide auto-zoom and auto-localization for attention to objects. *Proc. Natl. Acad. Sci. U. S. A.*  
287 108, 7583–7588 (2011).
- 288 16. Zhou, H., Friedman, H. S. & von der Heydt, R. Coding of border ownership in monkey visual  
289 cortex. *J. Neurosci.* 20, 6594–6611 (2000).
- 290 17. Wu, X., Zhou, L., Qian, C., Gan, L. & Zhang, D. Attentional modulations of the early and later  
291 stages of the neural processing of visual completion. *Sci. Rep.* 5, 8346 (2015).
- 292 18. Pelli, D. G. The VideoToolbox software for visual psychophysics: Transforming numbers into  
293 movies. *Spat. Vis.* 10, 437–442 (1997).
- 294 19. Brainard, D. H. The Psychophysics Toolbox. *Spat. Vis.* 10, 433–436 (1997).
- 295 20. JASP Team. *JASP (Version 0.8.5)[Computer software]*. (2018).

296

## 297 **Acknowledgments**

298 The authors thank Dr Emily Wiecek for her constant critical feedback, without which we would not  
299 have developed our methods fully. We also thank Guido Maiello for providing feedback on earlier  
300 versions of the manuscript. This work was supported by NIH grant R01EY021553 (PJB) and the  
301 National Health and Medical Research Council of Australia APP1091257 (WJH).

302

## 303 **Author contributions**

304 W.J.H. and P.J.B. designed the Kanizsa stimuli and psychophysical procedure. A.J.A. ran the  
305 experiment, and W.J.H. analyzed the data. W.J.H. and P.J.B. wrote the manuscript. All authors  
306 discussed the results and commented on the manuscript.

## 307 **Data availability**

308 The data that support the findings of this study are available from the corresponding author upon  
309 request.

310 The authors declare no competing financial interests.

311

## 312 **Methods**

### 313 *Participants*

314 15 observers completed the psychophysical experiment, including the authors. All were  
315 naïve to the purposes of the experiment, except for authors W.J.H. and P.J.B. This  
316 experiment was approved by the Northeastern University Institutional Review Board, and  
317 methods were carried out in accordance with the relevant guidelines. All participants were  
318 fully informed as to the requirements of participation prior to providing their consent.

### 319 *Stimuli and procedure*

320 Stimuli were programmed with the Psychophysics Toolbox <sup>18,19</sup> in MATLAB (MathWorks),  
321 and were displayed on a CRT (40 x 30 cm, 1024 x 768 pixels; 85 Hz refresh). Six inducer  
322 “pacmen” (diameter = 3° visual angle; jaw angle = 60°) were arranged at the corners of an  
323 imaginary hexagram with a uniform gray background (luminance = 20 cd/m<sup>2</sup>). From trial to  
324 trial, the inducers could be all white or all black (homogenous condition), or mixed (see  
325 Fig. 2). Maximum luminance of the white inducers was 40 cd/m<sup>2</sup>, minimum luminance of  
326 the black inducers was 0 cd/m<sup>2</sup>. Blur conditions were achieved by applying a Gaussian  
327 spatial filter with standard deviation of 0.1, 0.5, 1.9, 7.5, or 30.1° (Fig. 2). The matching  
328 triangle was an equilateral triangle (edge length = 6°) whose luminance varied according  
329 to an observer’s responses (see below). The matching triangle was presented on a  
330 background of white noise (mean luminance = 20 cd/m<sup>2</sup>), to which the same spatial filter  
331 was applied as for the Kanizsa figure. The apex of the matching triangle pointed upward or  
332 downward, depending on the condition (see below).

333 Observers sat in a dimly lit room approximately 58 cm from the display with a keyboard in  
334 their lap. Prior to each trial, visual noise masked the entire display for 500 ms. The  
335 Kanizsa figure was then presented on one half of the monitor and the matching triangle  
336 was presented on the other half (Fig. 2C). The side of the Kanizsa figure (and therefore  
337 the matching triangle) was selected randomly on each trial. Observers were instructed to  
338 press the left arrow key if the matching triangle was darker than the corresponding illusory  
339 triangle, or the right arrow key if it was lighter. The stimulus remained on the screen until a  
340 response was made. Responses were not time-limited and reaction times were not

341 recorded: observers were instructed to not respond until they attended to the cued  
342 triangle.

343 To estimate PSEs from all 20 conditions in a single testing session, we used a 2-down 2-  
344 up staircase procedure that varied the luminance of the matching triangle according to an  
345 observer's response series for each condition. Although this staircase converges on an  
346 observer's point of subjective equality (PSE) – the luminance at which the matching  
347 triangle appeared equal to the attended illusory triangle – we nonetheless fit psychometric  
348 functions to constrain the PSE estimate by all observations (see *Analyses* section below).  
349 The staircase started randomly between  $\pm 20\%$  contrast to ensure fitted psychometric  
350 functions were constrained. The initial step size was 10%, and halved after each reversal.  
351 A separate staircase was run for each of the 20 conditions, with all conditions interleaved.  
352 A staircase for a given condition ended after seven reversals, after which the condition  
353 was removed from the trial sequence.

354 For each of the five blur conditions (Fig. 2B), the inducers and matching triangle were  
355 arranged into four conditions: homogenous black inducers, homogenous white inducers,  
356 mixed inducers with the matching triangle cueing the white inducers, mixed inducers with  
357 the matching triangle cueing the black inducers. In all conditions, the orientation of the  
358 matching triangle was randomized to match the appropriate target illusory figure. Thus,  
359 with the five blur conditions and four inducer conditions, each observer was tested on a  
360 total of 20 conditions. Conditions were presented in random order until at least seven  
361 button press reversals were registered for every condition.

362 Prior to testing, observers were introduced to the classic Kanizsa figure, and then our  
363 modified mixed-inducer figure (Fig. 1). The experimenter then explained the task using  
364 static images that exemplified each of the inducer and blur conditions. When describing  
365 that the matching triangle cued the observer to which of the two possible illusory triangles  
366 to respond, the experimenter never referred to the inducer color, but only to the upward or  
367 downward pointing illusory triangle. The participants completed about 20 trials of practice  
368 and verbalized their responses in order for the experimenter to check they understood the  
369 task. Observers were encouraged to actively look at the matching triangle and illusory  
370 triangle, and to take their time with each decision. Training and all conditions were tested  
371 in a single session lasting approximately 30 minutes.



372 *Analyses*

373 Cumulative Gaussian functions were fit to the proportion of “lighter” responses at each  
374 luminance level of the matching triangle for each of the twenty conditions. The PSE was  
375 the luminance that produced 50% lighter responses, converted to Weber contrast:

376 
$$\text{Weber contrast} = \frac{(L_m - L_b)}{L_b},$$

377 where  $L_m$  is the luminance of the matching triangle producing 50% lighter responses for a  
378 given condition, and  $L_b$  is the mean luminance of the background. This value was  
379 converted to a percent by multiplying by 100. Bayesian analyses were performed in JASP  
380 <sup>20</sup>. In Figure 4B, we subtracted the mean PSE when the black inducers were cued from the  
381 mean PSE when the white inducers were cued for each blur condition.

382
